# Supplementary material for: Application of a regularised Coulomb sliding law to Jakobshavn Isbræ, western Greenland
Source: Copernicus journal article supplement (doi:10.5194/tc-18-5101-2024), 2024-11-08
Supplement: Supplementary file 1 [file tc-18-5101-2024-supplement.pdf]

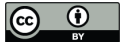

*Supplement of*

## **Application of a regularised Coulomb sliding law to Jakobshavn Isbræ, western Greenland**

**Matt Trevers et al.**

*Correspondence to:* Matt Trevers ([matt.trevers@bristol.ac.uk](mailto:matt.trevers@bristol.ac.uk))

The copyright of individual parts of the supplement might differ from the article licence.

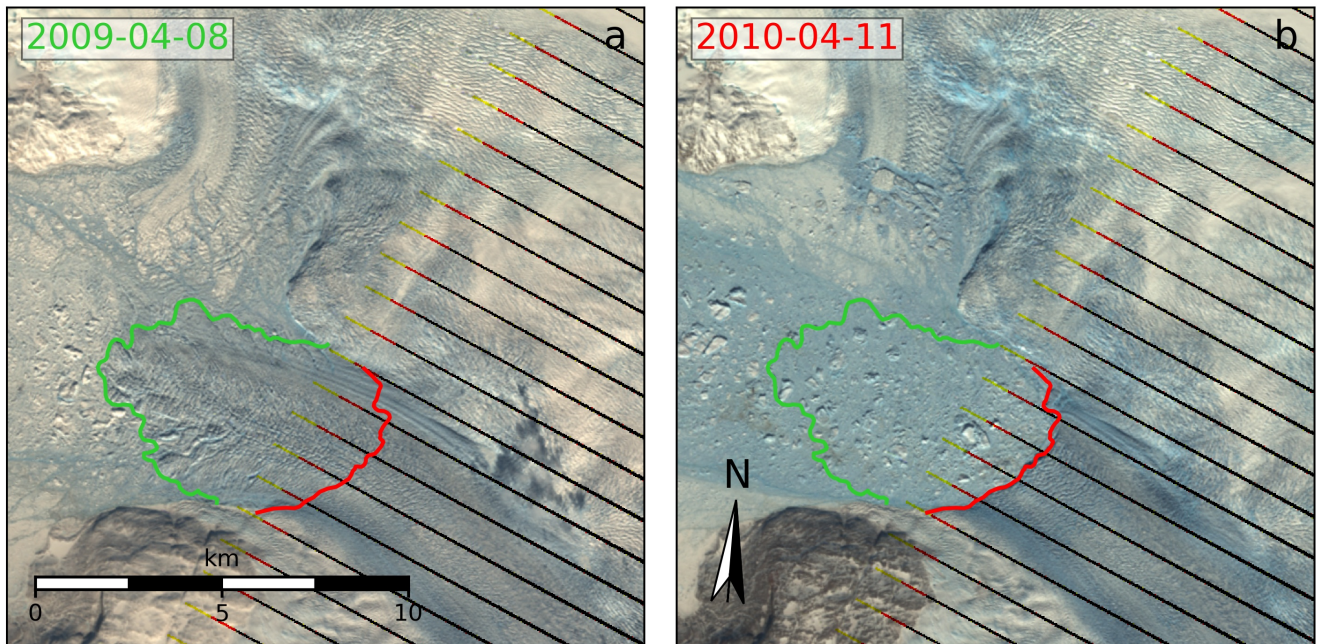

**Figure S1.** Landsat 7 true-colour images of the glacier terminus from two dates in 2009 (a) and 2010 (b) separated by nearly a year. The 2009 image shows the glacier terminus protruding into the fjord, while the 2010 terminus is significantly retreated by comparison. Outlines of the 2009 (green) and 2010 (red) terminus are shown in both panels. Black stripes are artifacts from the Landsat image.

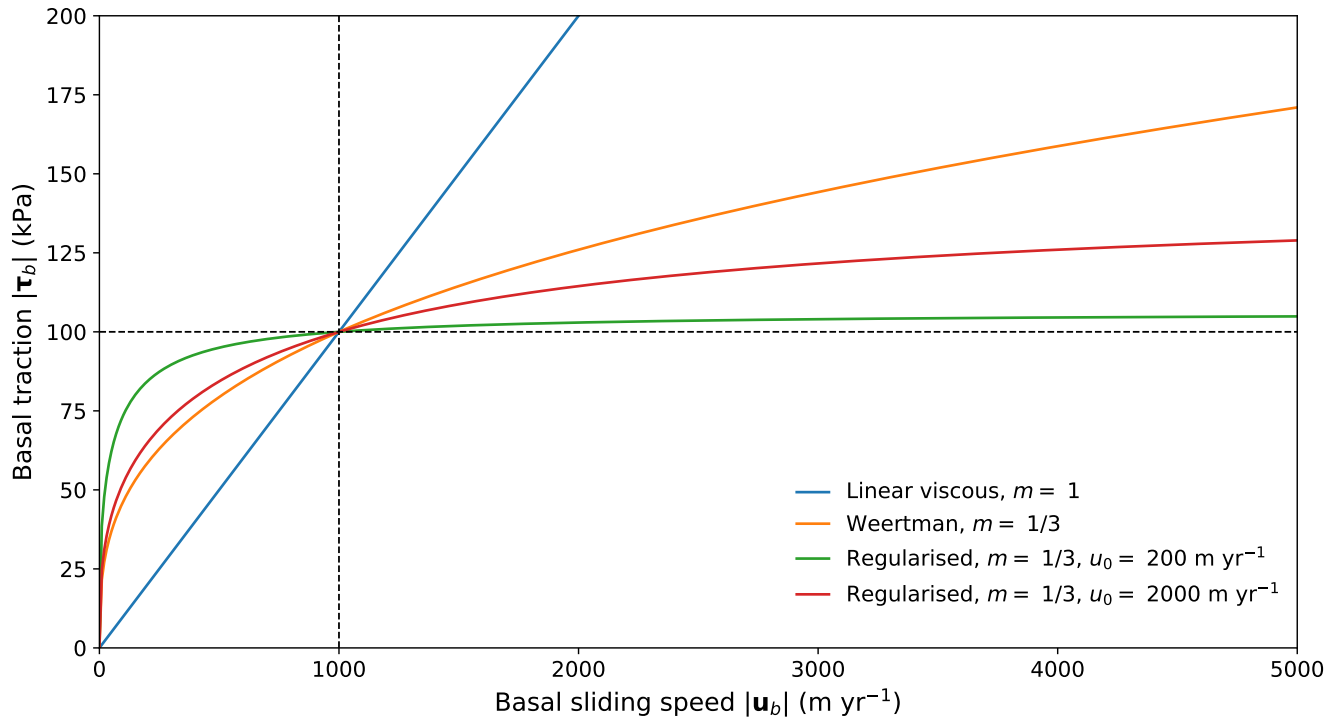

**Figure S2.** Basal traction plotted as a function of the sliding speed for different sliding laws. Values of the basal friction coefficient  $C$  were chosen such that the traction has a value of 100 kPa for a sliding speed of  $1000 \text{ m yr}^{-1}$ . Figure adapted from Joughin et al. (2019, Fig. 1) but using different parameter values.

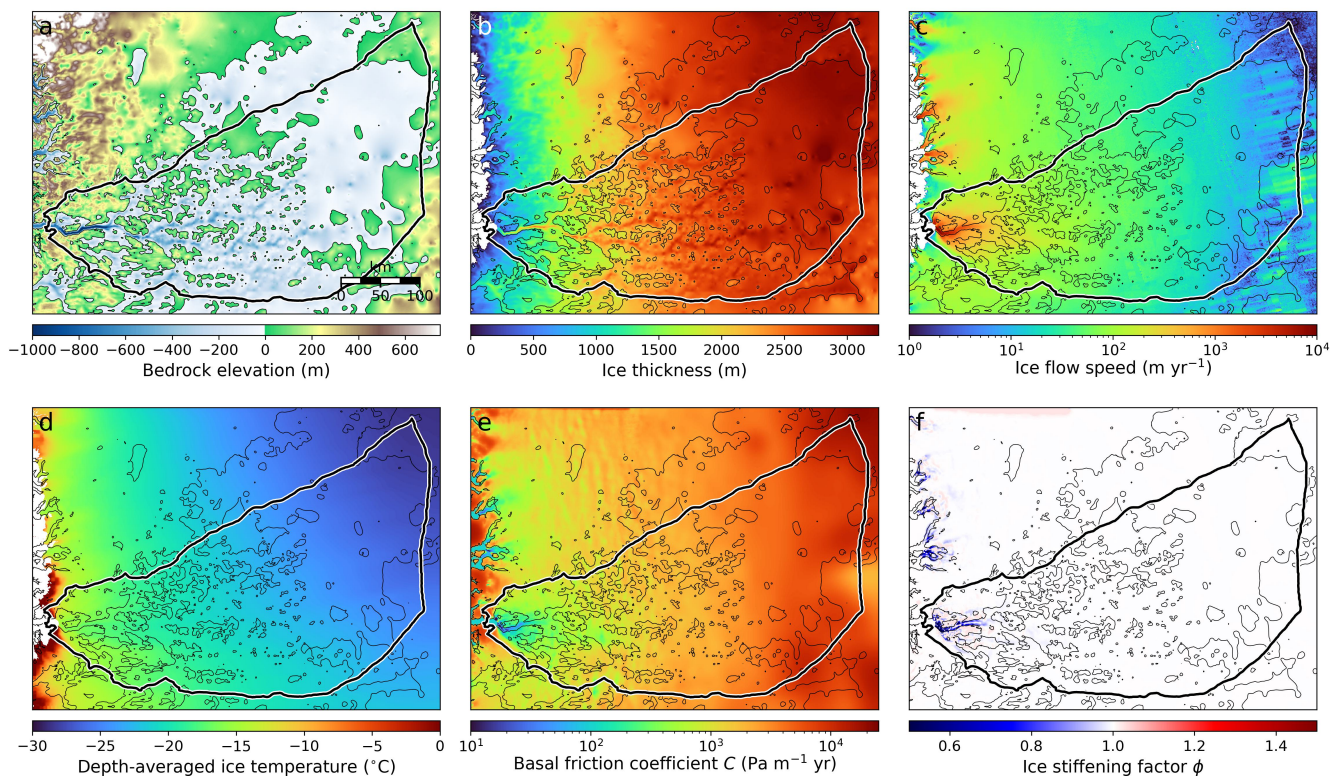

**Figure S3.** Inverse model inputs for the initial reference timeslice for the full model domain. (a) Bedrock topography (BedMachine v3, ) (b) ice thickness (BedMachine v3, ) (c) 2008 and 2009 mean ice flow speed (Rignot and Mouginot, 2012, v4), (d) ice temperature, (e) basal friction coefficient and (f) ice stiffening factor. Thin contours delineate the sea level bedrock elevation contour while the thick black line marks the drainage basin boundary.

| Dataset                                                                                                                      | Source                                 | Time range                                                           | Resolution | $\alpha_u^2$ |
|------------------------------------------------------------------------------------------------------------------------------|----------------------------------------|----------------------------------------------------------------------|------------|--------------|
| International Polar Year GrIS Velocity<br>(Rignot and Mouginot, 2012, v4)                                                    | Envisat<br>RADARSAT-1                  | 2008 to 2009<br>Initial reference timeslice                          | 150 m      | 1            |
| MEaSURES Greenland Ice Velocity: Selected Glacier Site<br>Velocity Maps from InSAR<br>(Joughin et al., 2020, NSIDC-0481, v2) | TerraSAR-X                             | 2008 to present<br>11 day repeat period                              | 100 m      | 2            |
| MEaSURES GrIS Velocity Map from InSAR<br>(Joughin et al., 2018, NSIDC-0478, v2)                                              | RADARSAT-1<br>Sentinel-1<br>TerraSAR-X | Annual: 2009, 2010, 2012 - 2017<br>Quarterly: 2009, 2010, 2012, 2013 | 500 m      | 1            |
| MEaSURES GrIS Monthly Velocity Mosaics from SAR and<br>Landsat<br>(Joughin, 2019, NSIDC-0731, v1)                            | Landsat-8<br>Sentinel-1<br>TerraSAR-X  | Dec 2014 to present                                                  | 200 m      | 1            |

**Table S1.** Details of velocity datasets assimilated in the time-dependent inverse model on a quarterly or annual basis.

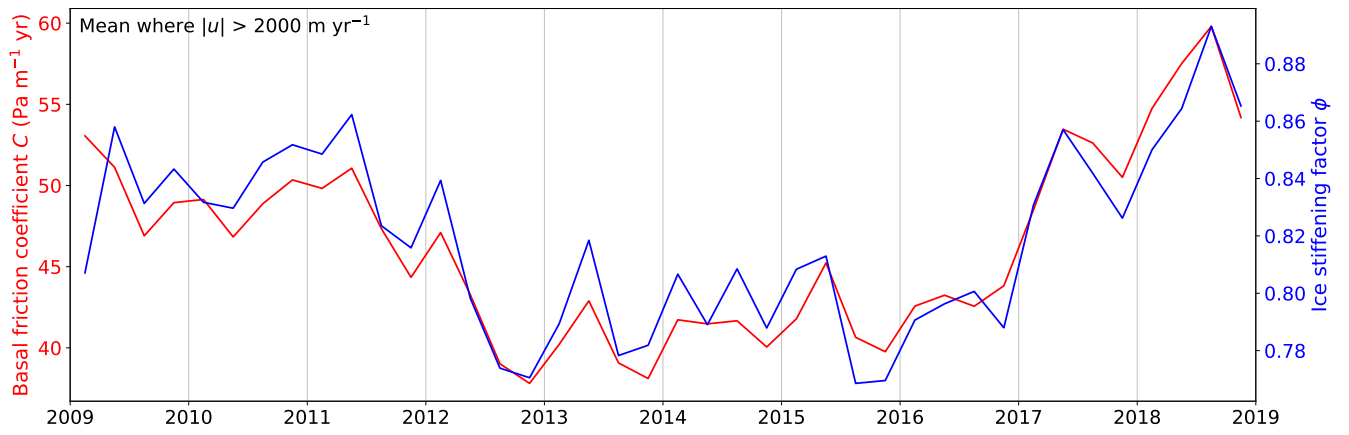

**Figure S4.** time-series of quarterly  $C$  and  $\phi$ , averaged across the region where the flow speed was always in excess of  $2000 \text{ m yr}^{-1}$ .

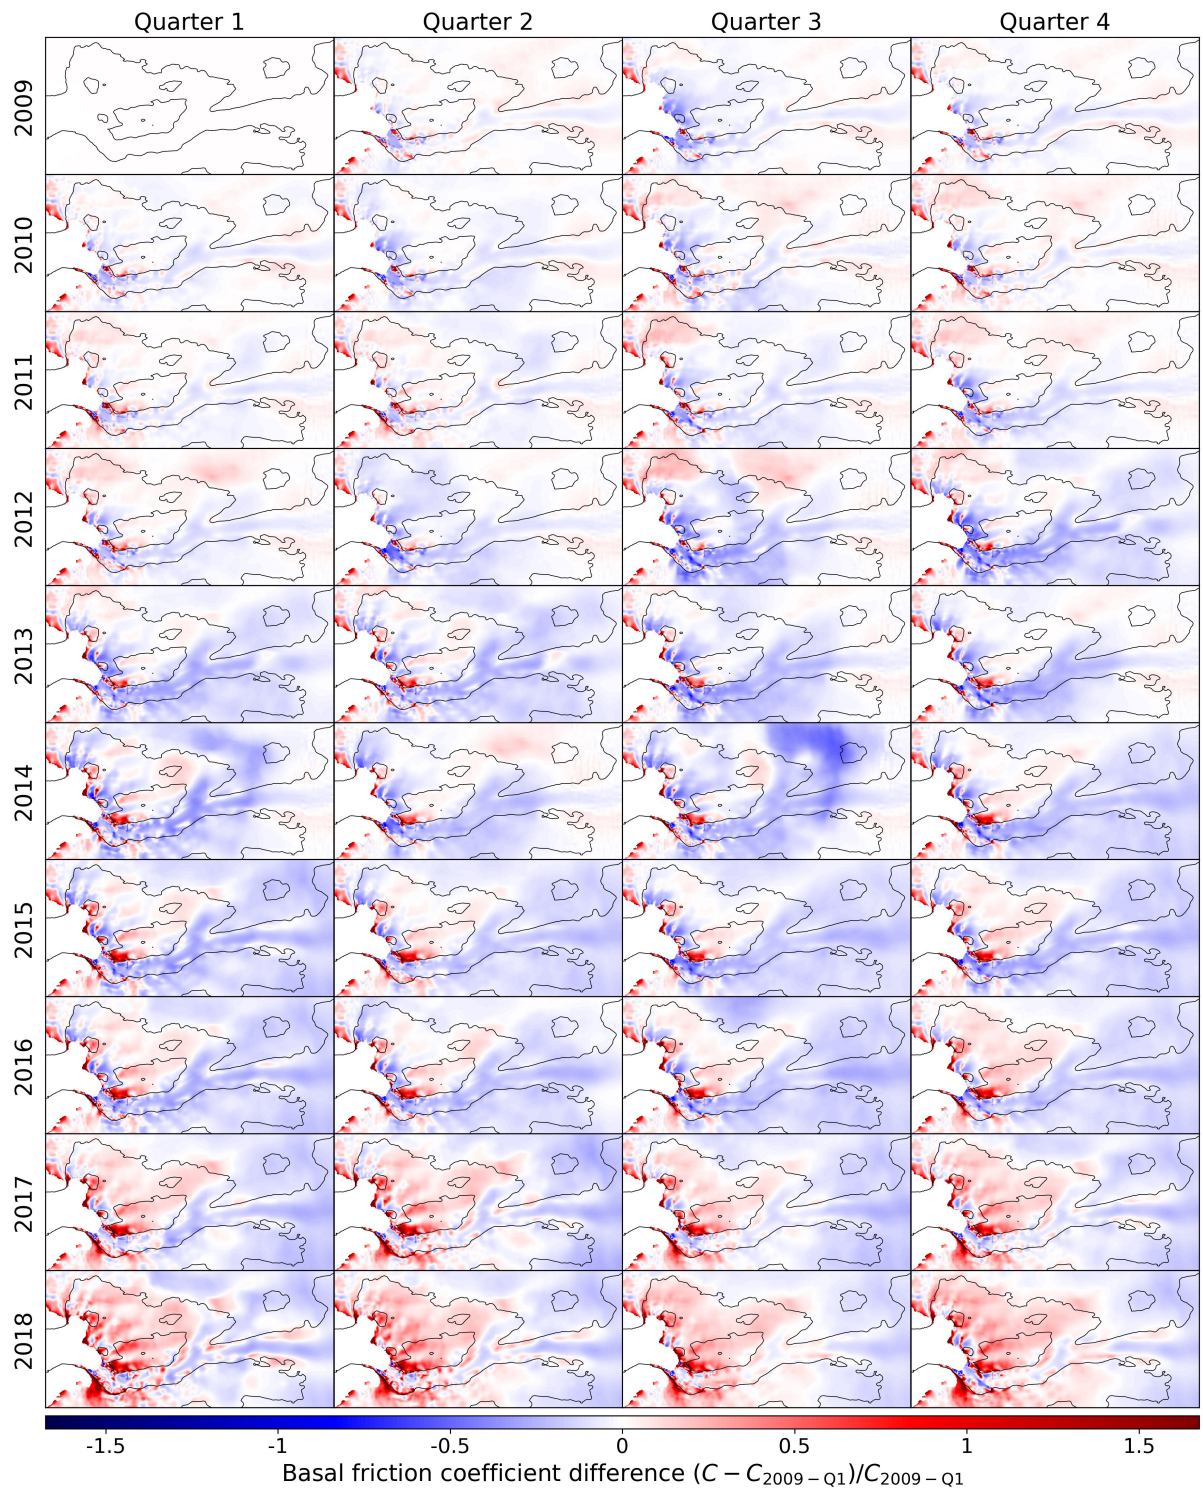

**Figure S5.** Relative difference in the basal friction coefficient  $C$  for each quarterly timeslice compared with the 2009-Q1 timeslice for the ice stream region of the domain.

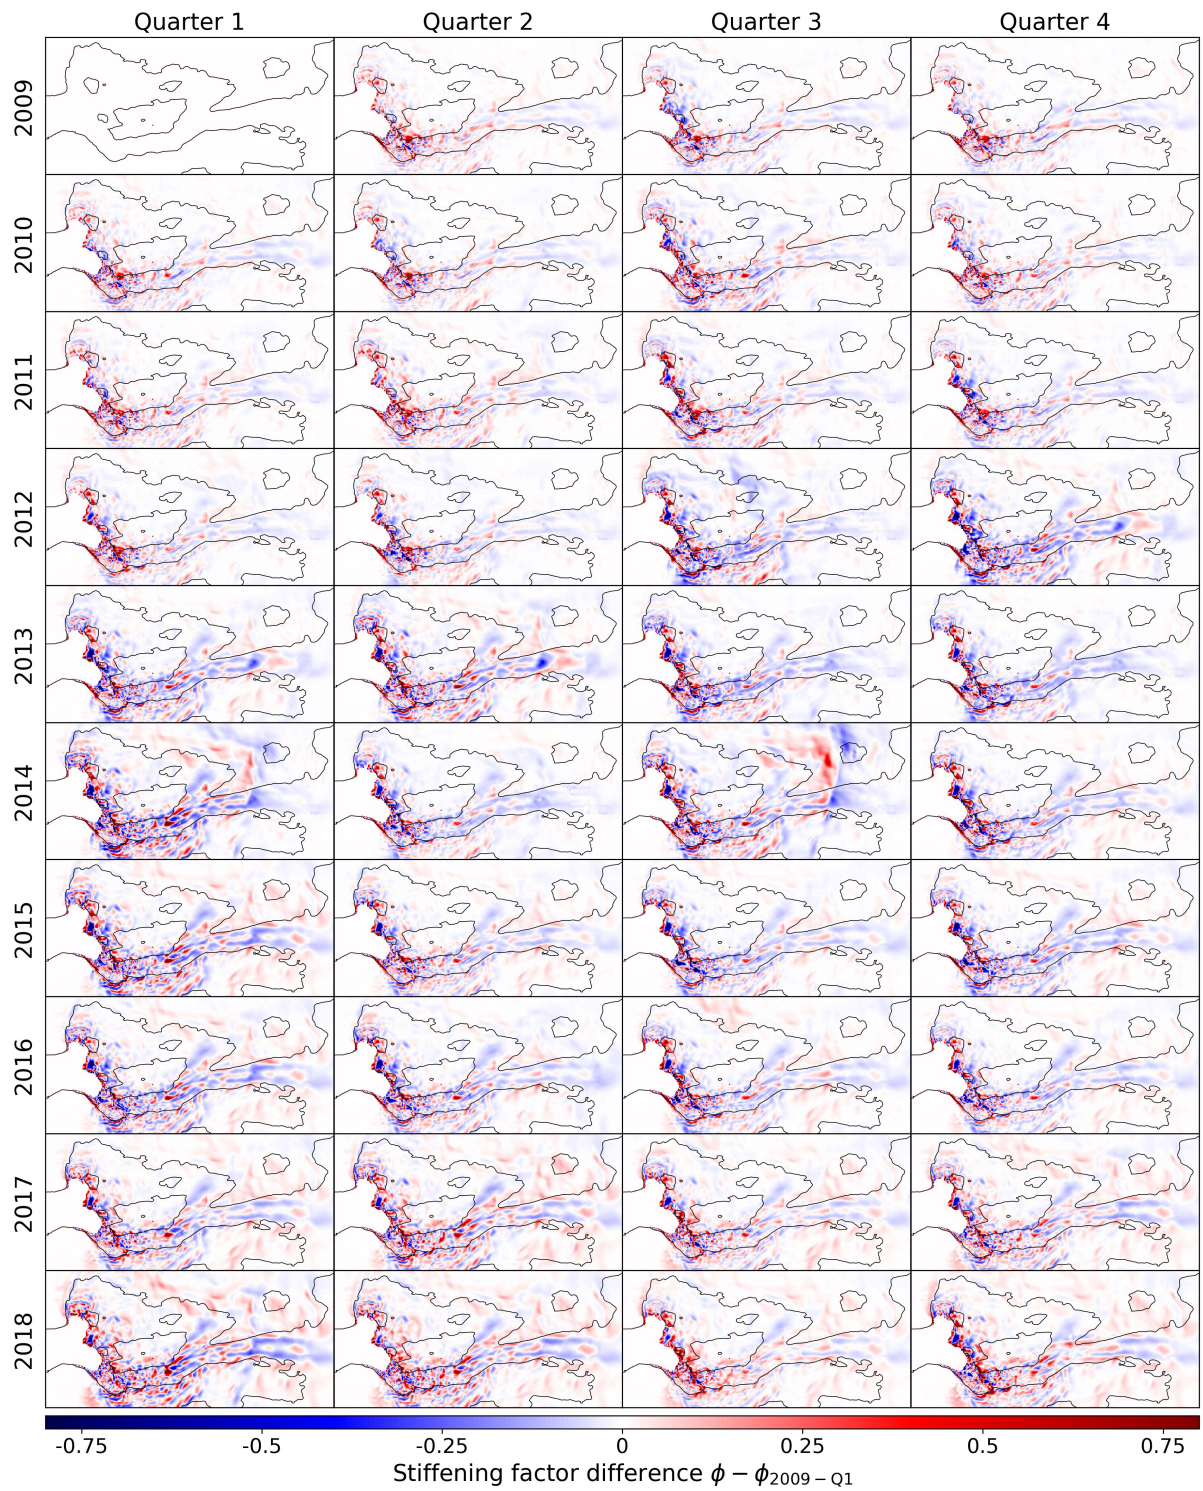

**Figure S6.** Difference of the stiffening factor  $\phi$  for each quarterly timeslice compared with the 2009-Q1 timeslice for the ice stream region of the domain.



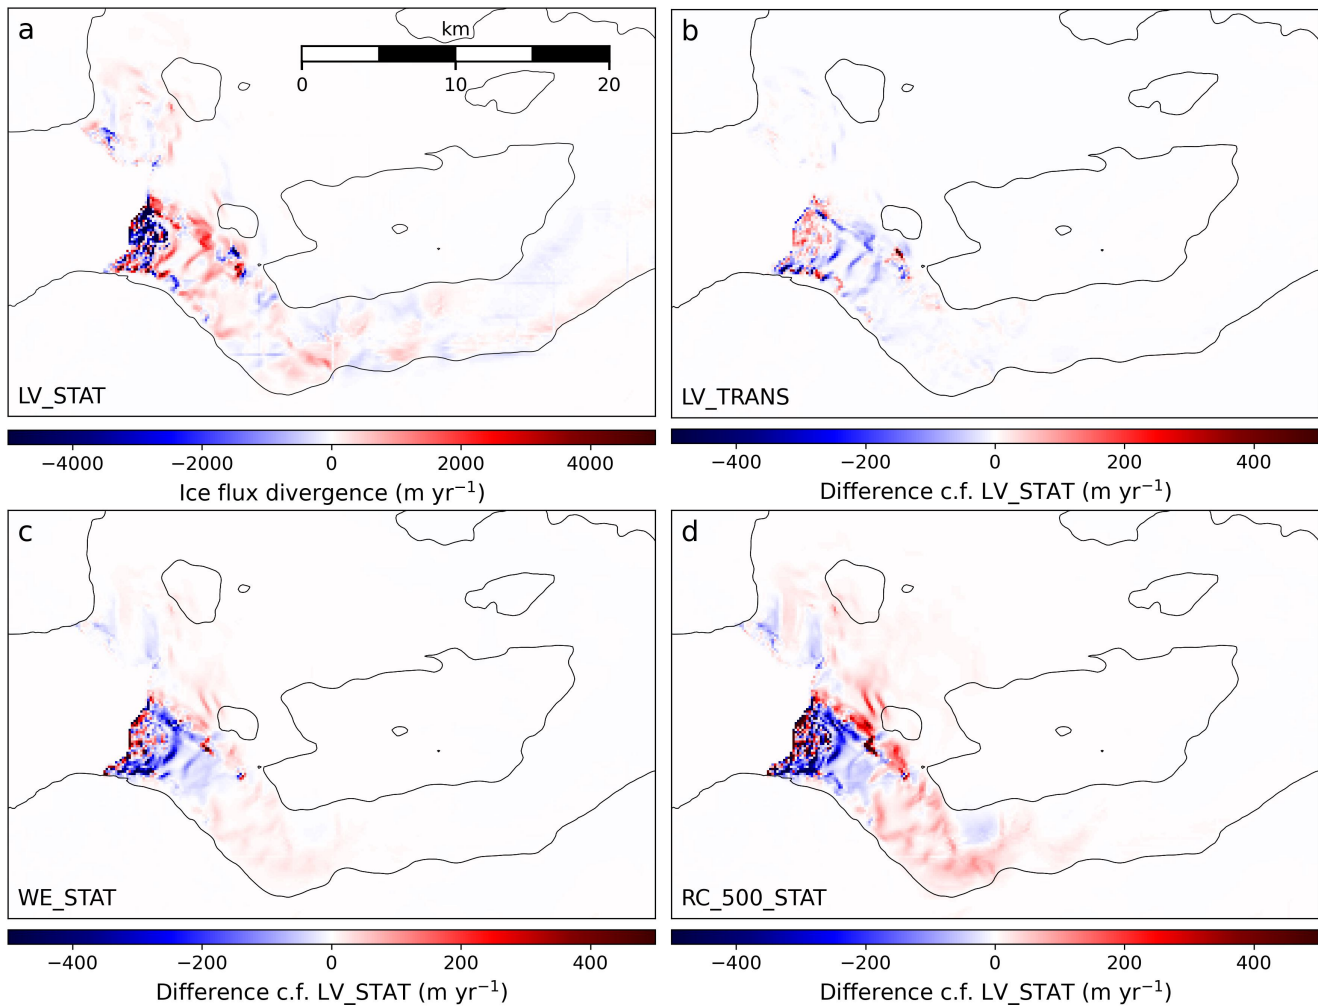

**Figure S7.** Ice flux divergence  $\nabla(uh)$  at the start of hindcast model simulations. (a) Ice flux divergence for the LV\_STAT experiment. (b) to (d) Difference in ice flux divergence relative to LV\_STAT for the LV\_TRANS, WE\_STAT and RC\_500\_STAT experiments respectively.

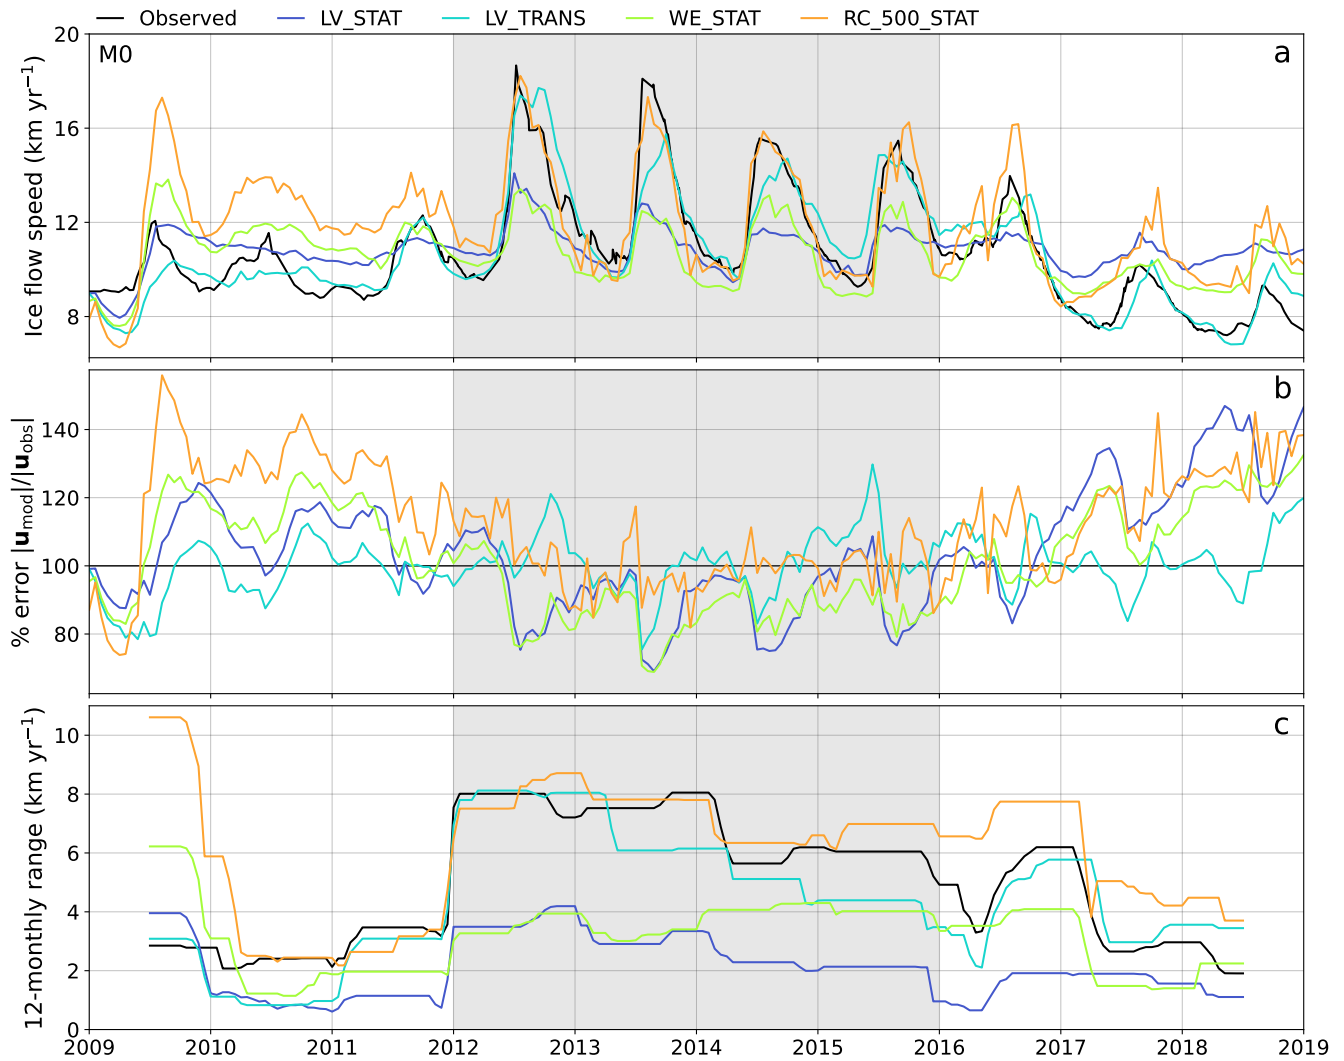

**Figure S8.** Modelled flow speeds in the hindcast simulations measured at site M0. (a) Observed (black line) and modelled (coloured lines) ice flow speeds. (b) Percentage error in modelled flow speeds. (c) Rolling 12-monthly velocity range. The 12-monthly range is calculated as the difference between maximum and minimum flow speeds within 6 months either side of the measurement. Panel (a) is identical to Figure 4 in the main text.

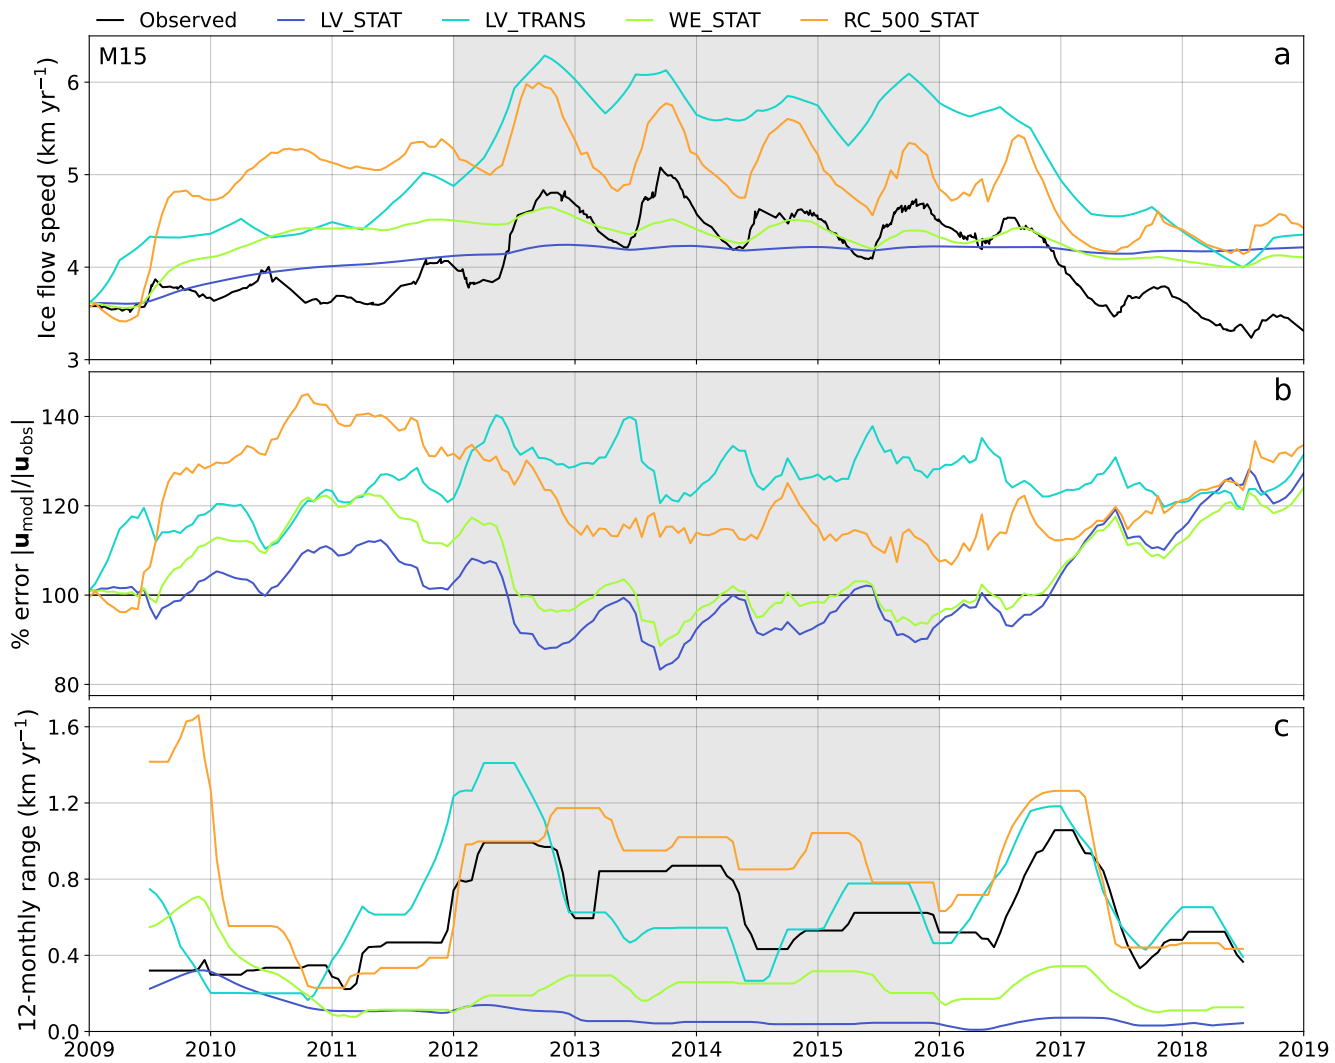

**Figure S9.** Modelled flow speeds in the hindcast simulations measured at site M15. (a) to (c) as in Figure S8.

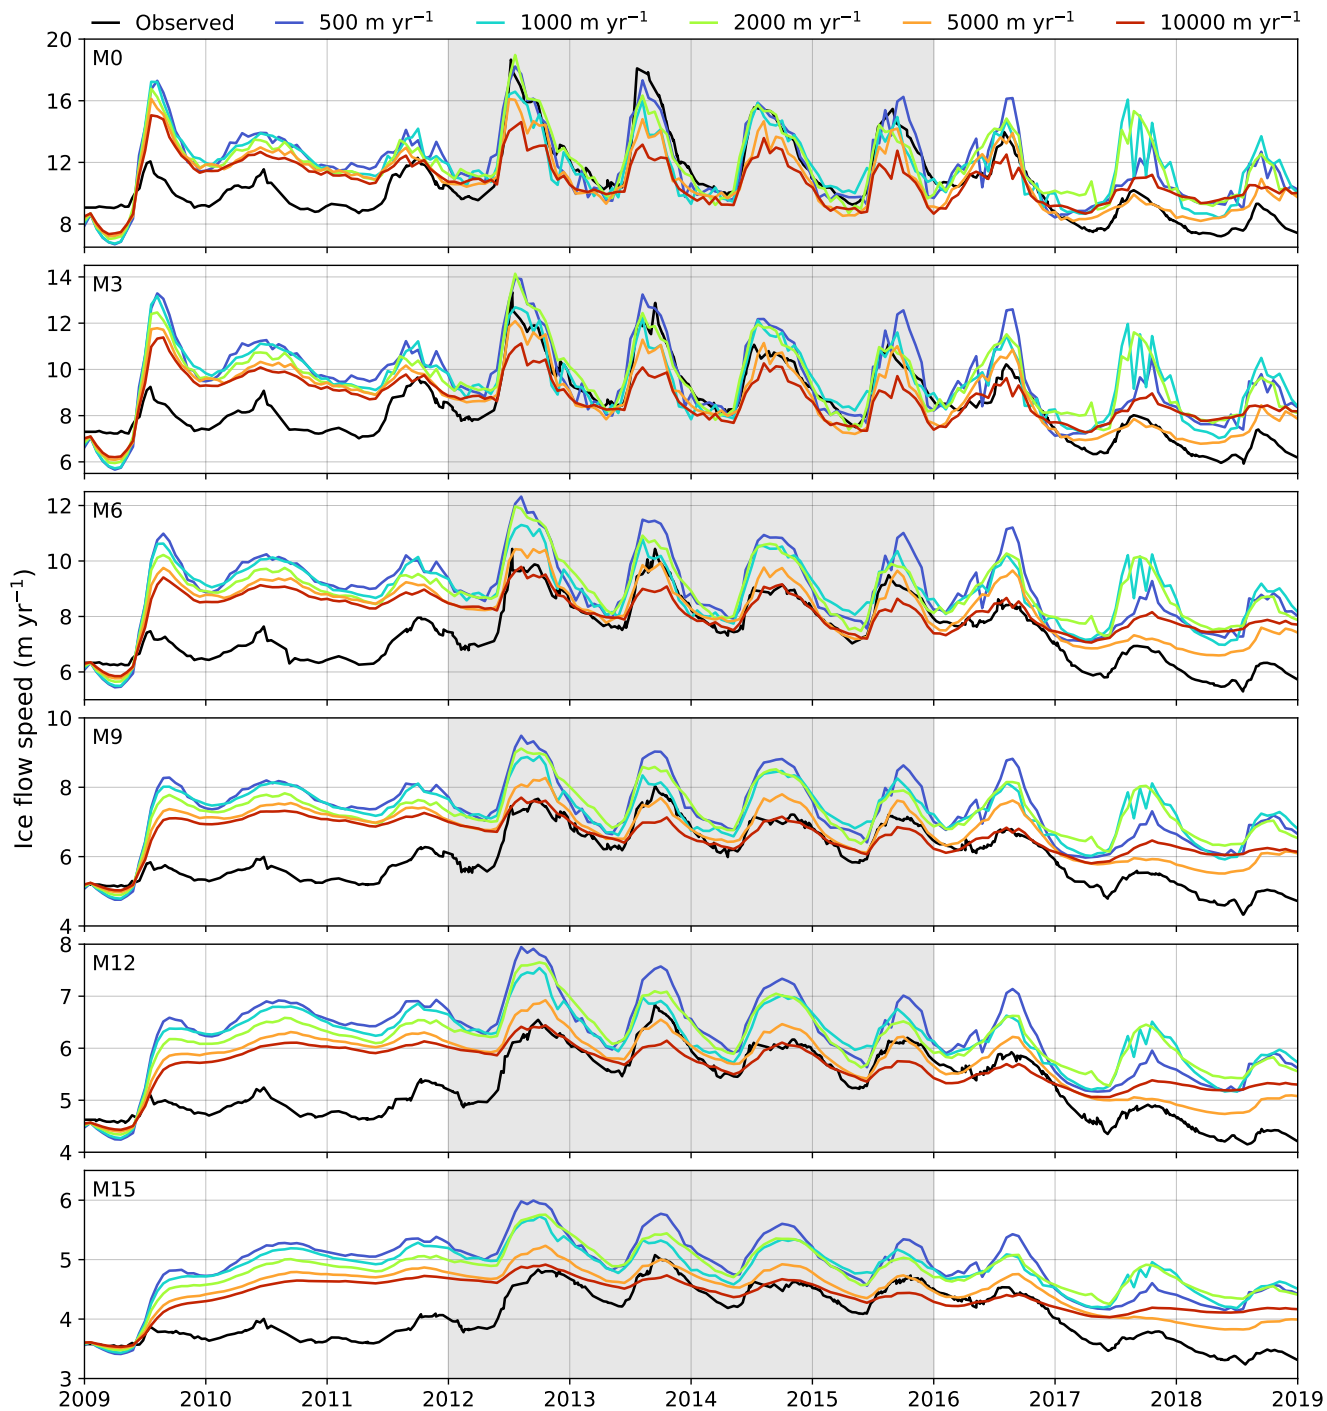

**Figure S10.** Time-series of observed (black line) and modelled (coloured lines) ice flow speeds at sites M0 to M15 for the regularised sliding law with a range of values of the fast-sliding speed  $u_0$ .

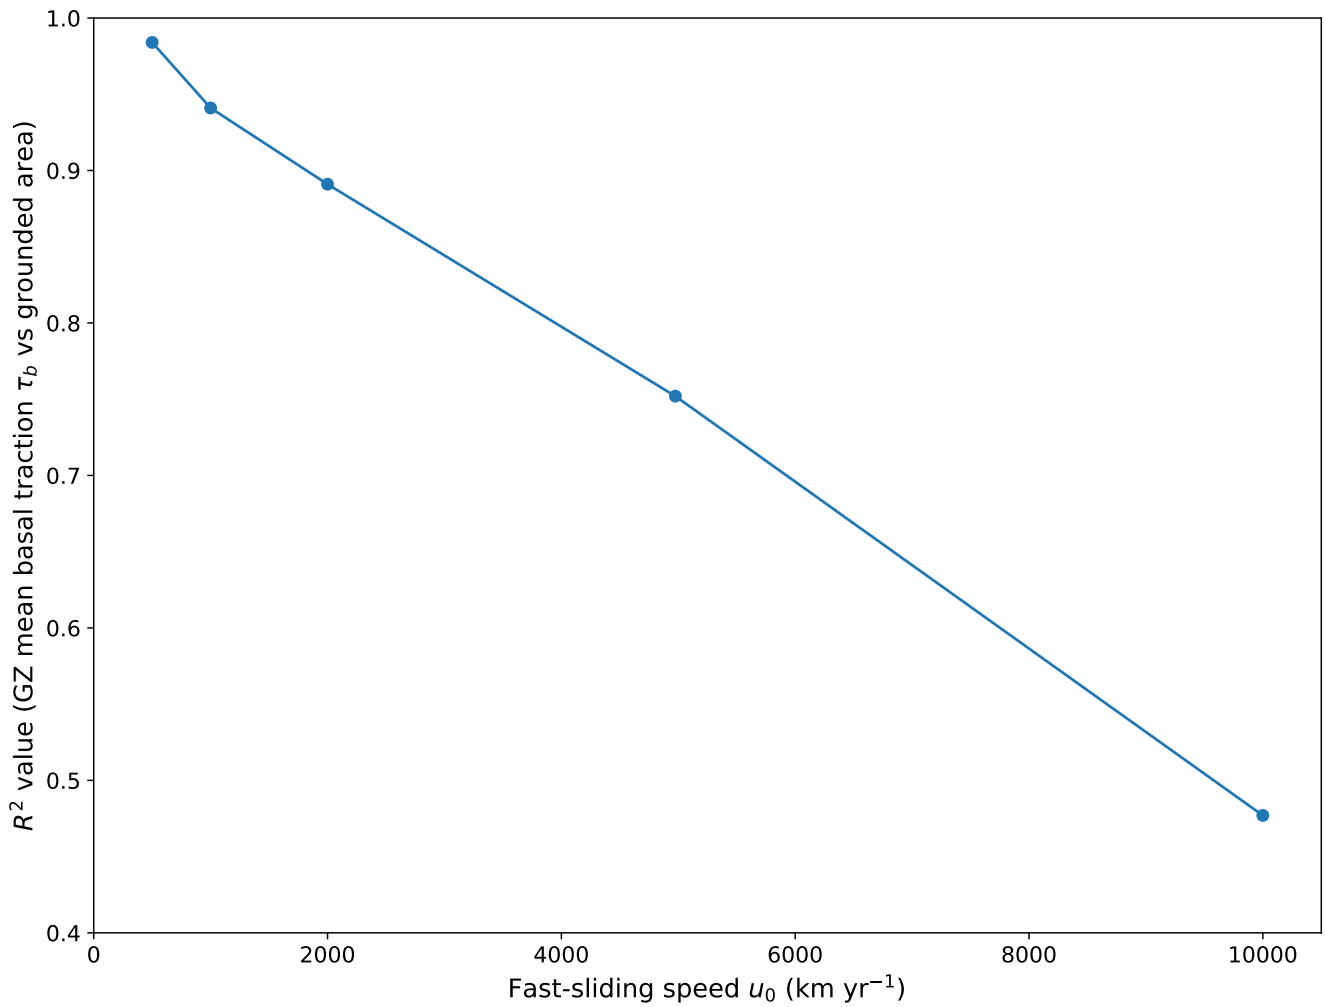

**Figure S11.** R-squared values for the linear relationship between mean basal traction and grounded area sampled within the GZ (e.g. Figure 7b and d) for a range of values of the fast-sliding speed  $u_0$ .  $R^2$  was 0.21 for Weertman sliding law which effectively has  $u_0 = \infty$ .

## References

- Joughin, I.: MEaSURES Greenland Monthly Ice Sheet Velocity Mosaics from SAR and Landsat, Version 1, <https://doi.org/https://doi.org/10.5067/OPFQ9QDEUFFY>, 2019.
- Joughin, I., Smith, B. E., Howat, I. M., and Scambos, T. A.: MEaSURES Greenland Ice Sheet Velocity Map from InSAR Data, Version 2,   
5 <https://doi.org/https://doi.org/10.5067/OC7B04ZM9G6Q>, 2018.
- Joughin, I., Shean, D. E., Smith, B. E., and Floricioiu, D.: A Decade of Variability on Jakobshavn Isbrae: Ocean Temperatures Pace Speed Through Influence on Mélange Rigidity, *The Cryosphere Discussions*, pp. 1–27, <https://doi.org/10.5194/tc-2019-197>, 2019.
- Joughin, I., Howat, I. M., Smith, B. E., and Scambos, T. A.: MEaSURES Greenland Ice Velocity: Selected Glacier Site Velocity Maps from InSAR, Version 2, <https://doi.org/https://doi.org/10.5067/JQHJUOYCF2TE>, 2020.
- 10 Rignot, E. and Mouginot, J.: Ice flow in Greenland for the International Polar Year 2008-2009, *Geophysical Research Letters*, 39, 0–7, <https://doi.org/10.1029/2012GL051634>, 2012.
